# Supplementary material for: Calix[4]arene-based supramolecular gels with unprecedented rheological properties
Source: Royal Society of Chemistry journal article supplement (doi:10.1039/c2sm07251c), 2012-01-01
Supplement: c2sm07251c.pdf [file c2sm07251c.pdf]

## Supplementary Information

*for*

# Calix[4]arene-based Supramolecular Gels with Unprecedented Rheological Properties

Xiuqin Cai,<sup>a,b</sup> Kaiqiang Liu,<sup>a</sup> Junlin Yan,<sup>a</sup> Helan Zhang,<sup>a</sup> Xiaoyu Hou,<sup>a</sup> Zhang Liu,<sup>a</sup> Yu Fang<sup>\*a</sup>

Key Laboratory of Applied Surface and Colloid Chemistry (Shaanxi Normal University), Ministry of Education, School of Chemistry and Chemical Engineering, Shaanxi Normal University, Xi'an 710062, P. R. China and College of Chemistry and Life Science, Weinan Normal University, Weinan 714000, P. R. China

### 1. Gelation behaviors of the compound

Table S1 Gelation behaviors of the compound (2.5%, w/v)

| Solvent    | Result | Solvent      | Result | Solvent                         | Result |
|------------|--------|--------------|--------|---------------------------------|--------|
| Methanol   | I      | Benzene      | S      | n-Decane                        | S      |
| Ethanol    | P      | Toluene      | S      | CH <sub>2</sub> Cl <sub>2</sub> | S      |
| 1-Propanol | S      | Xylene       | S      | CHCl <sub>3</sub>               | S      |
| 1-Butanol  | S      | THF          | S      | CCl <sub>4</sub>                | S      |
| 1-Pentanol | S      | Cyclohexane  | S      | Kerosene                        | S      |
| 1-Hexanol  | S      | Acetonitrile | I      | EtOAc                           | S      |
| 1-Heptanol | S      | n-Hexane     | S      | TEA                             | I      |
| 1-Octanol  | S      | n-Heptane    | S      | DMSO                            | P      |
| 1-Nonanol  | S      | n-Octane     | S      | DMF                             | S      |
| 1-Decanol  | S      | n-Nonane     | S      | Acetone                         | S      |

**Notes:** S=soluble at room temperature or under heating; I=insoluble even after heating to the boiling point of the solvent; P=soluble in a hot solvent, but precipitate when cooling down.

### 2. Microscopy images

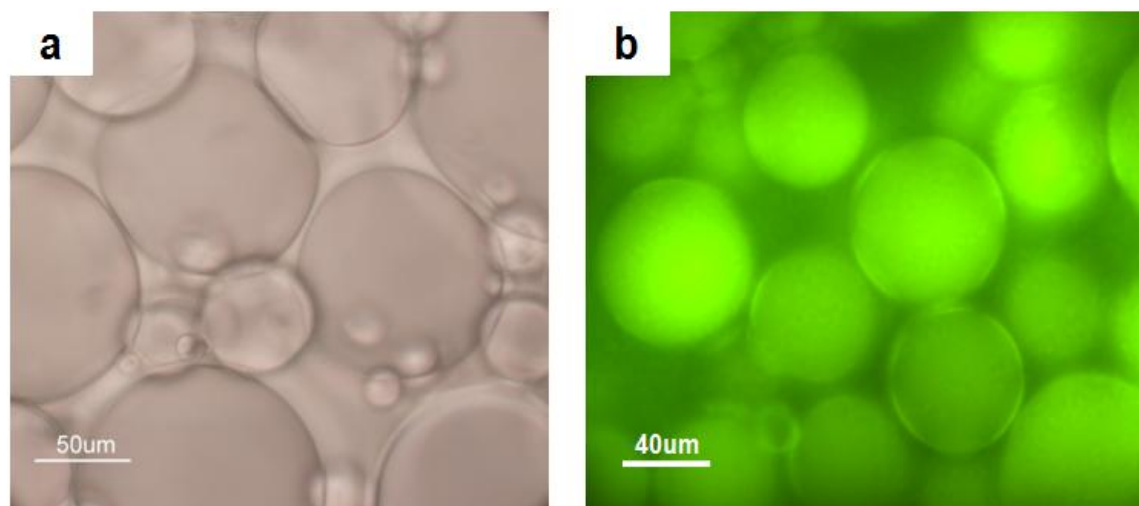

**Figure S1** a) Optical and fluorescent images (a and b, respectively) of a gel of the mixture solvent of *n*-decane and acetonitrile (1:1 in volume ratio). The content of the gelator in the mixture solvent is 2.5% (*w/v*), and the fluorescent probe dissolved in the system is  $6 \times 10^{-4}$  mol/L. The probe is a cholesteryl derivative of NBD (*c.f.* structure shown below), which was prepared and characterized by Miss Zhiyan Xu (unpublished result). The fluorophore is soluble in acetonitrile, but insoluble in *n*-decane.

### 3. Molecular structure of the fluorescent probe

Molecular structure of the fluorescent probe

#### 4. Rheological studies

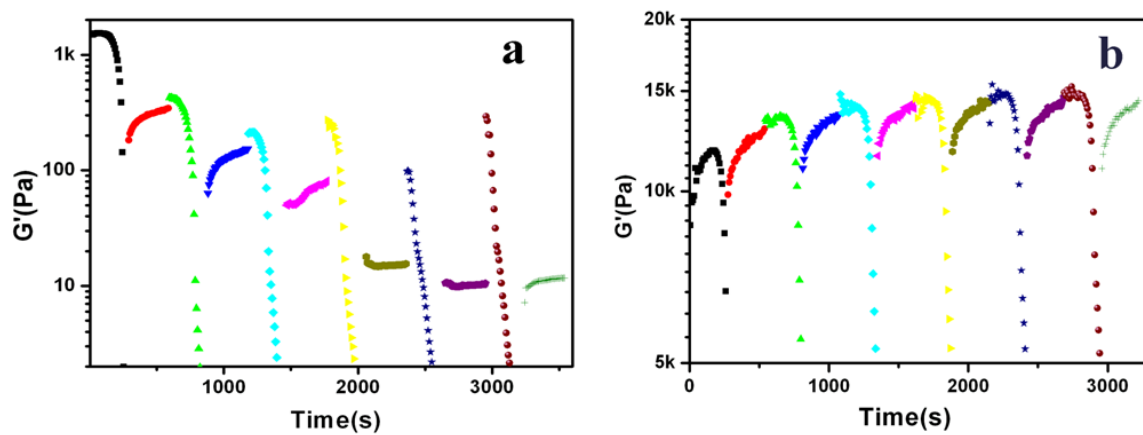

**Figure S2** Evolution of  $G'$  as functions of applied shear stress and recovery time (1%, 1.5%, w/v, a, b).
